# Supplementary material for: Chemotherapy impairs ovarian function through excessive ROS-induced ferroptosis
Source: PubMed Central journal article supplement (PMC10209065; doi:10.1038/s41419-023-05859-0), 2023-05-24

Fig. 3  
AMH

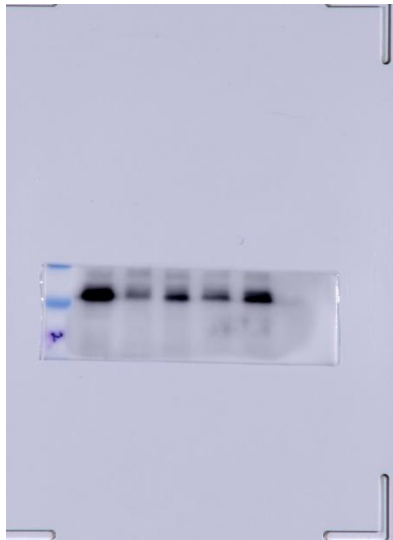

FSHR

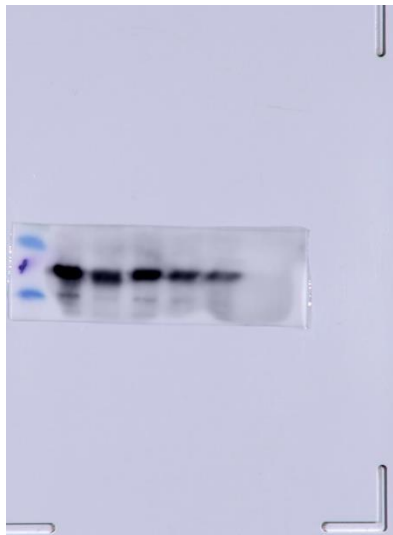

GAPDH

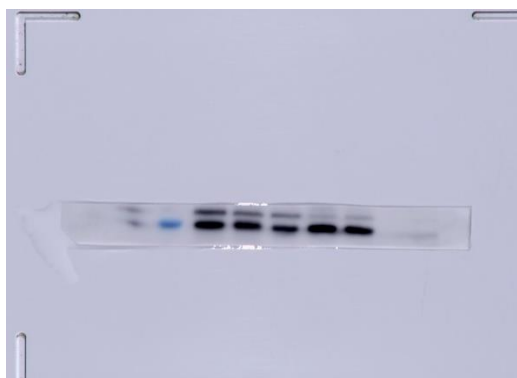

TGF- $\beta$

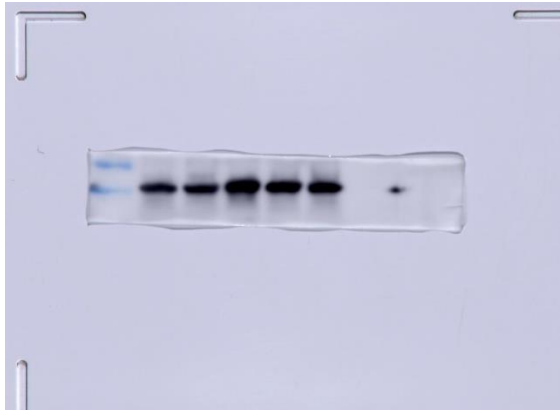

Fig. 4  
KGN  
Bcl-2

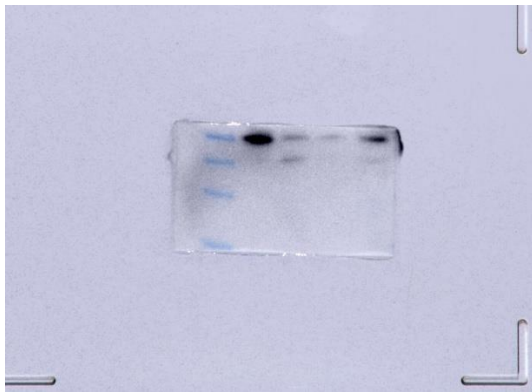

Cleaved caspase-3

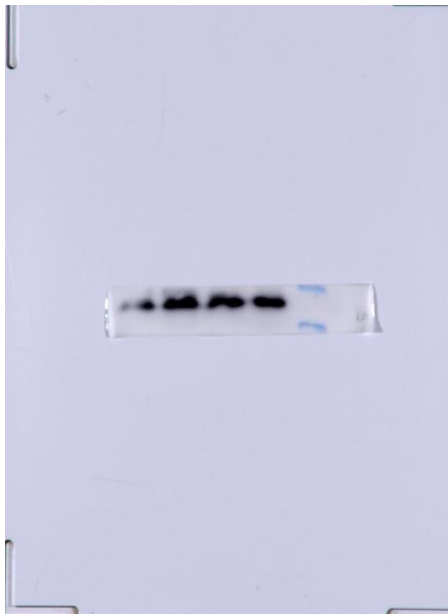

HO-1

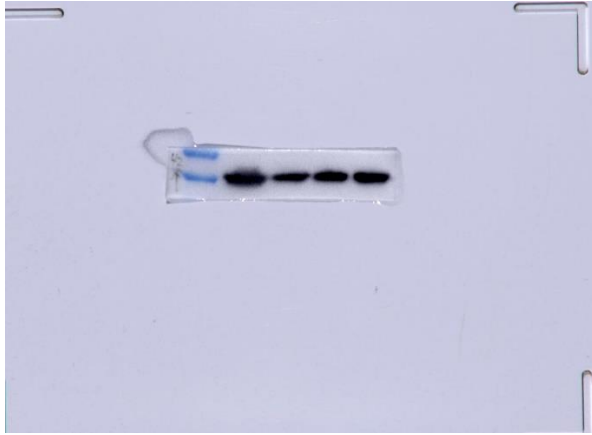

Keap-1

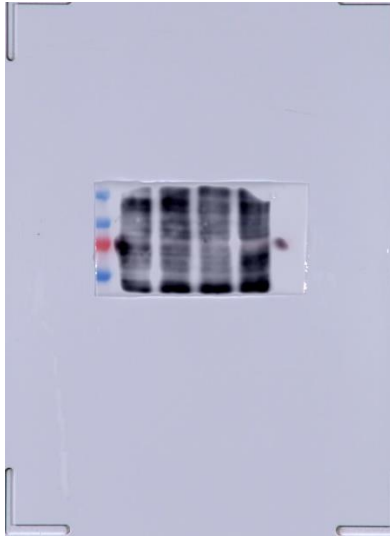

Nrf-2

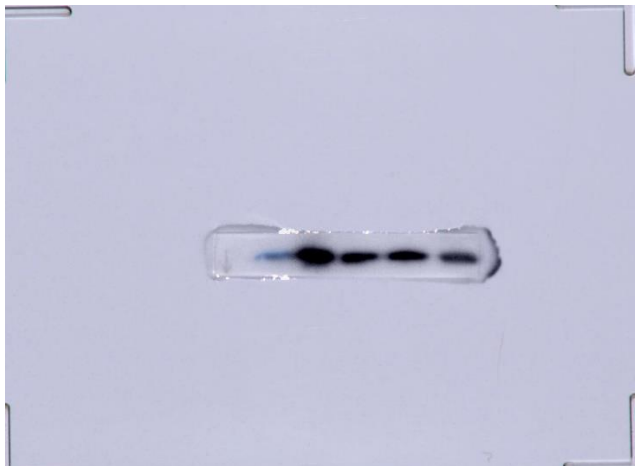

GAPDH

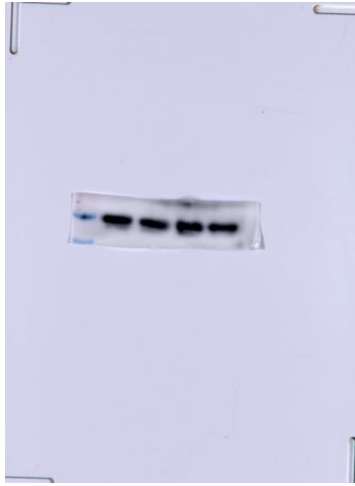

SVOG

Bcl-2

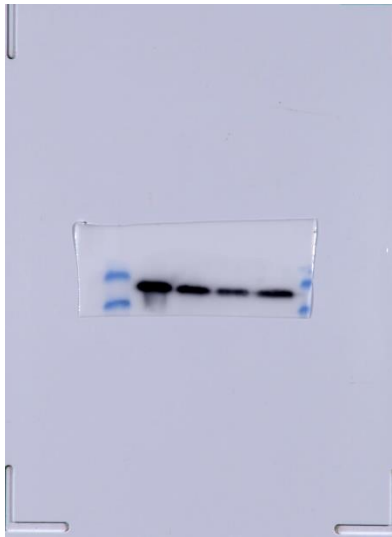

CLeaved-Caspase-3

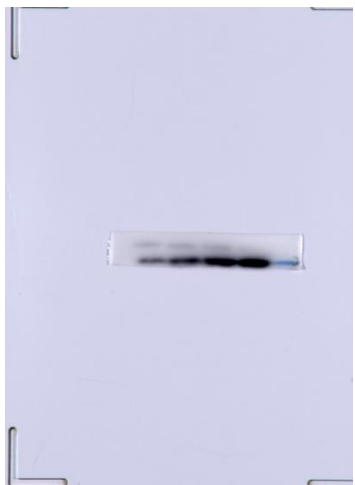

HO-1

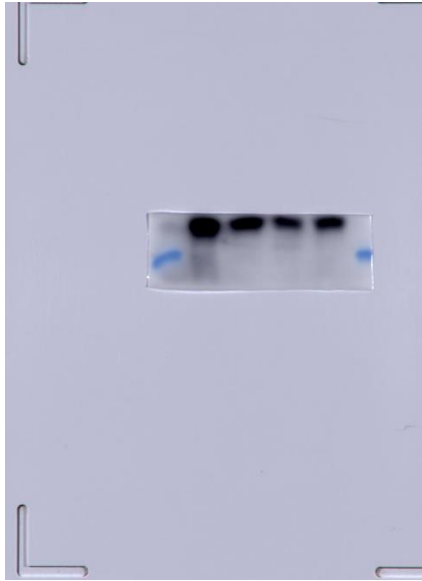

Keap-1

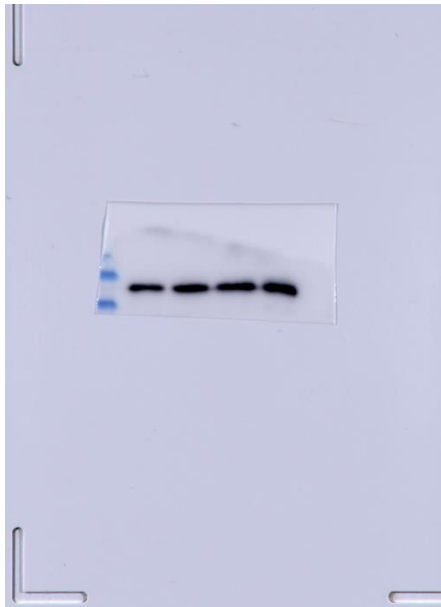

Nrf-2

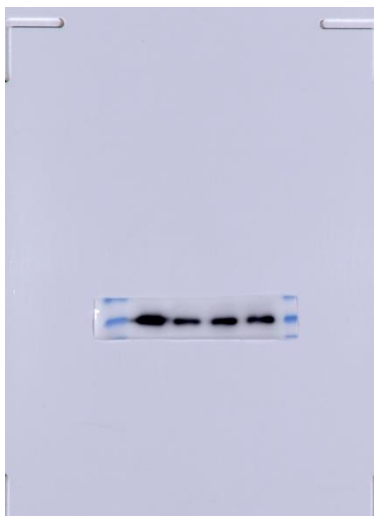

GAPDH

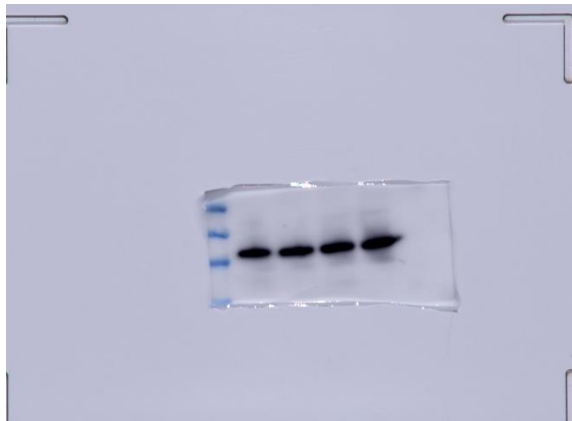

KGN  
GPX4

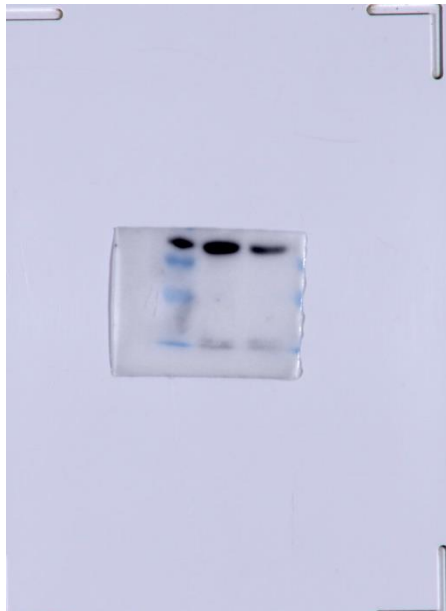

Nrf-2

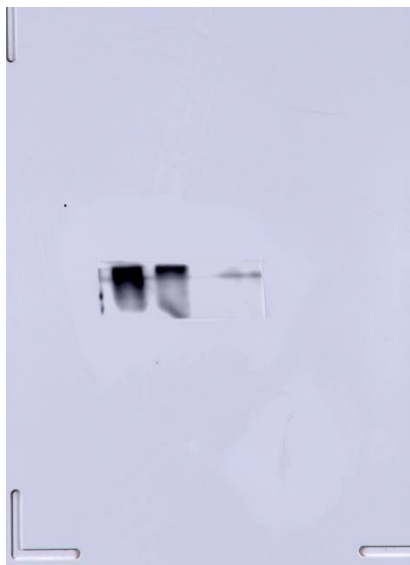

TFR

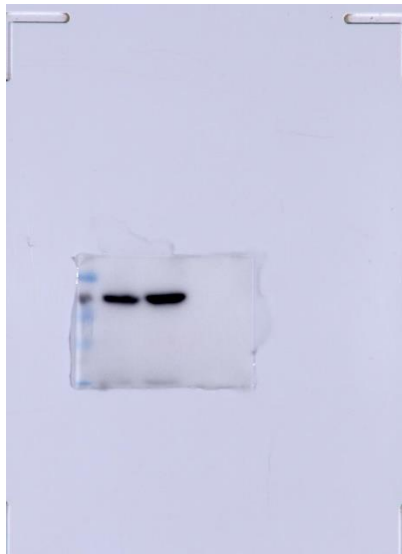

GAPDH

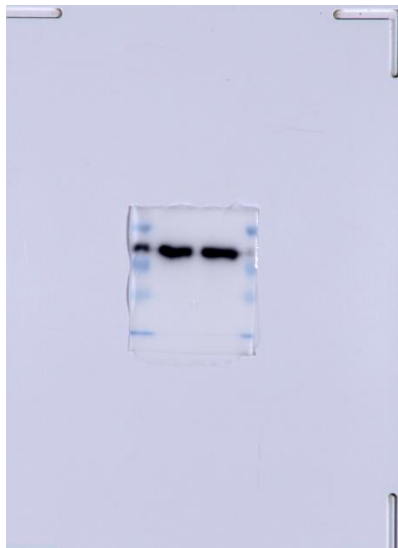

SVOG

GPX4

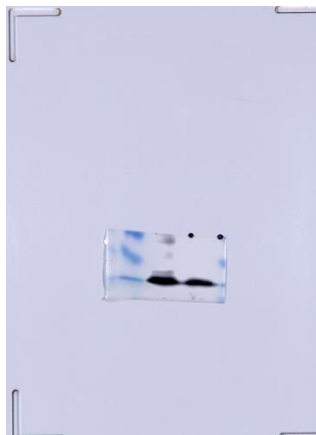

Nrf2

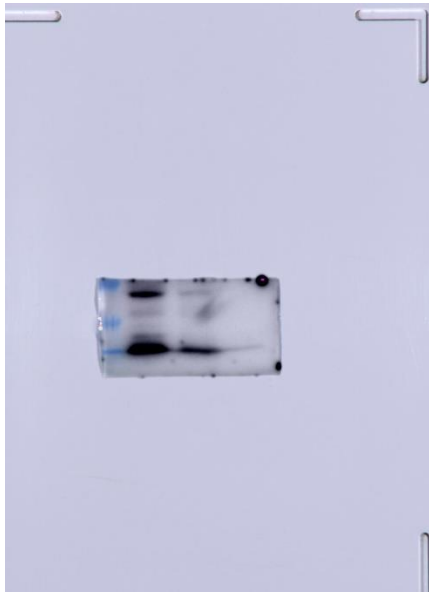

TFR

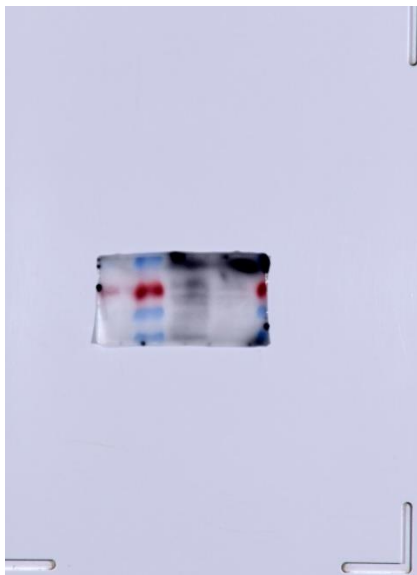

KGN

GPX4

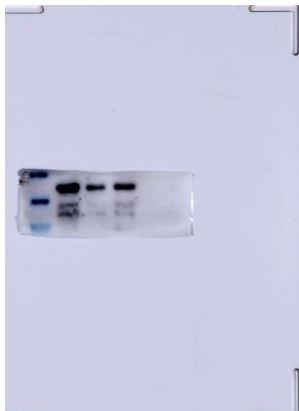



HO-1

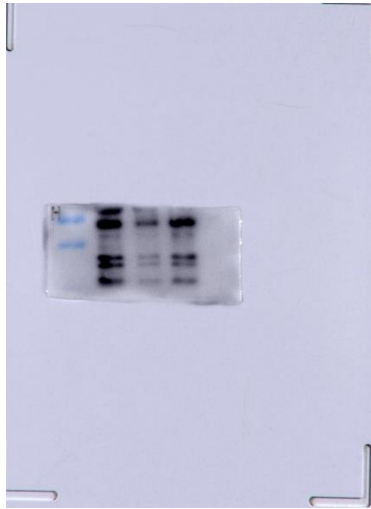

Nrf-2

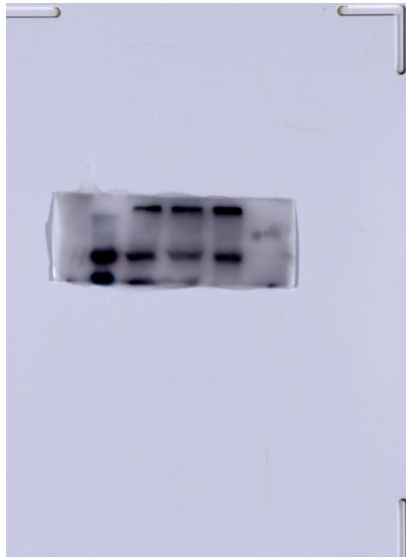

GAPDH

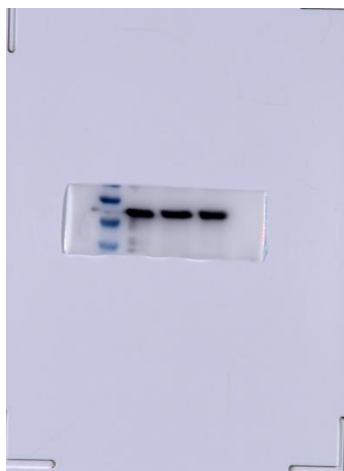

SVOG  
GPX4

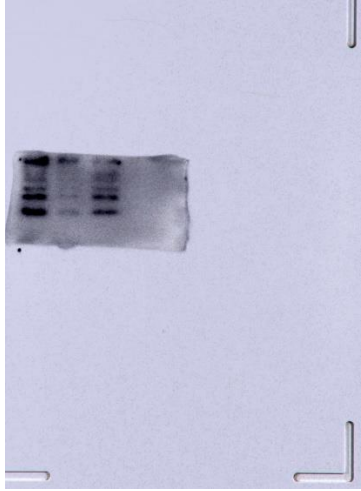

HO-1

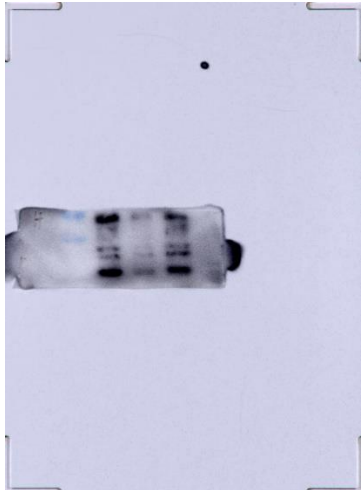

Nrf-2

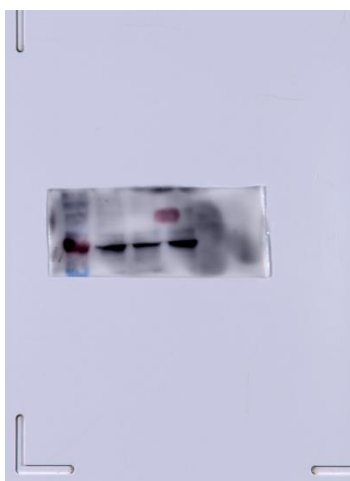

GAPDH

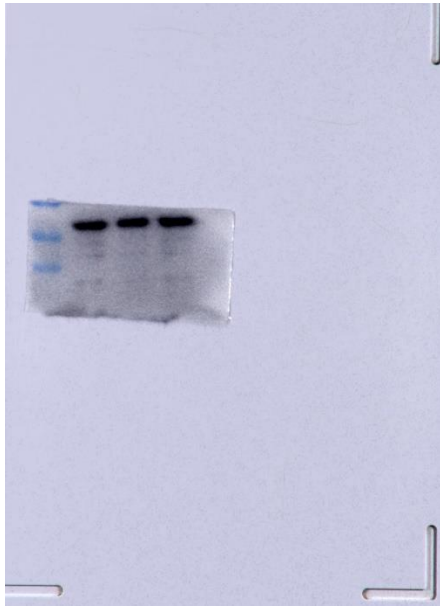

Supplement: 41419_2023_5859_MOESM7_ESM.pdf [file 41419_2023_5859_MOESM7_ESM.pdf]
